# Supplementary material for: Distinct skeletal stem cell types orchestrate long bone skeletogenesis
Source: eLife. 2021 Jul 19;10:e66063. doi: 10.7554/eLife.66063 (PMC8289409; doi:10.7554/eLife.66063)
Supplement: Figure 1—figure supplement 1—source data 1. [file elife-66063-fig1-figsupp1-data1.xlsx]

## Sheet: Sheet1
Figure 1 - supplement 1D
	E17.5	E17.5	Adult	Adult
	ocSSC	pvSSC	ocSSC	pvSSC
	17	3.8	9.5	15
	19	3.6	17	10
	20	3.2	17.5	21
