# Supplementary material for: Distinct skeletal stem cell types orchestrate long bone skeletogenesis
Source: eLife. 2021 Jul 19;10:e66063. doi: 10.7554/eLife.66063 (PMC8289409; doi:10.7554/eLife.66063)
Supplement: Figure 2—figure supplement 1—source data 1. [file elife-66063-fig2-figsupp1-data1.xlsx]

## Sheet: Sheet1
Figure 2A - Supplemental 1F								Figure 2A - Supplemental 1G
	Tie2+	Tie2-ItgaV-	6C3+Thy1-	Thy+6C3-	Thy+6C3+	ocSSC/BCSP			pvSSC	APC
	80.1	7.79	0	2.16	9.96	0			0	0
	81.4	8.33	0	1.96	7.35	0.98			0.87	0
	72.6	10.1	0.48	4.33	12	0.48			1.73	0
