# Supplementary material for: Distinct skeletal stem cell types orchestrate long bone skeletogenesis
Source: eLife. 2021 Jul 19;10:e66063. doi: 10.7554/eLife.66063 (PMC8289409; doi:10.7554/eLife.66063)
Supplement: Figure 2—source data 1. [file elife-66063-fig2-data1.xlsx]

## Sheet: Sheet1
Figure 2A									Figure 2b									Figure 2E
		ocSSC			BCSP						ocSSC			BCSP						ocSSC					BCSP					THY1+					6C3+					Tie2					pvSSC
	Diaphysis	0	0	0	3	0	2			E13.5	37548	40495	36636	19461	18049	20467			ocSSC	2.78	2.78	7.64	16.2		0.56	0.56	10.3	12.8		1.67	1.67	54.7	30.8		0.56	0.56	1.6	5.13		21.1	21.1	2.31	2.56		0	0	0.62	1.41
	Metaphysis/Growth Plate	49	73	44	25	9	12			E15.5	10391	9536	10717	10523	18592	17944			pvSSC	0	0	0	0	0	0	0	0	0	0	0	0	66.7	14.3	66.7	0	0	0	28.6	0	53.5	38.5	0	0	0	3.21	1.02	5.38	6.9	6.73
	Epiphysis	18	26	18	18	14	20			E17.5	3020	3478	3128	6888	7129	7880
	Periosteum	12	8	10	6	2	2			P1	2200	2110	2368	5476	5523	6036
										P7	1261	1326	1358	2384	2570	2523
										8wks	15	16	18	81	71	72
		pvSSC			APC
	Diaphysis	3	3	1	4	9	6				pvSSC			APC
	Metaphysis/Growth Plate	13	6	14	27	25	27			E13.5	6	7	8	0	0	0
	Epiphysis	54	57	46	32	26	35			E15.5	34	32	35	0	0	0
	Periosteum	16	5	9	9	2	4			E17.5	508	552	492	40	44	20
										P1	387	372	408	544	552	594
										P7	72	64	82	324	315	332
										8wks	13	5	12	24	40	26
[truncated: 5 more columns]
