# Supplementary material for: Distinct skeletal stem cell types orchestrate long bone skeletogenesis
Source: eLife. 2021 Jul 19;10:e66063. doi: 10.7554/eLife.66063 (PMC8289409; doi:10.7554/eLife.66063)
Supplement: Figure 3—figure supplement 1—source data 1. [file elife-66063-fig3-figsupp1-data1.xlsx]

## Sheet: Sheet1
Figure3 -Supplement1A							Figure3 -Supplement1B							Figure3 -Supplement1C								Figure3 -Supplement1E						Figure3 -Supplement1F
	Total Reads			% Uniquely Mapped
	ocSSC	pvSSC		ocSSC	pvSSC			ERCC fraction %			Gene count				Ribo %			Mito %					BCSP no	BCSP irra	APC no	APC irra				BCSP			APC
	963936	994754		83.46	82.87			ocSSC	pvSSC		ocSSC	pvSSC			ocSSC	pvSSC		ocSSC	pvSSC				0.013	0.012	0.025	0.068
	930396	990714		64.26	80.12			10.1677	5.74828		1938	1721			2.21135	1.06202		1.12256	0.273586				0.024	0.0097	0.039	0.047			5dpf	5.01193	3.11397	2.69751	3.5503	2.0155	2.72374
	382263	1940489		75.45	83.47			5.58038	6.90716		2213	1801			1.67033	1.23421		0.739852	0.821746				0.032	0.013	0.035	0.066			10 dpf	6.85279	8.07175	4.52962	3.38462	4.53846	0.842105
	1475279	2793442		76.95	84.35			4.84727	6.77898		2117	2078			2.35685	1.11232		0.807777	0.584995				0.018	0.00553	0.036	0.12			15 dpf	2.52324	2.08333	3.53982	3.51351	5.90909	3.84615
	1319846	1750775		81.51	84.02			5.9856	17.3111		1517	1708			0.25275	1.07991		0.444278	2.08705				0.024	0.022	0.02	0.17
	320687	1779395		65.63	85.01			27.4251	10.0785		1366	1210			1.48573	1.42444		0.176544	0.257895				0.025	0.00928	0.064	0.13
	1240962	241773		76.58	50.79			3.07405	14.1989		2294	1518			0.746913	2.66675		0.346296	0.673084					0.00326		0.11
	1184988	862898		81.69	82.75			17.4295	6.22776		1744	2024			2.53214	1.17765		3.43133	0.489061
	2491274	271313		83.67	60.32			9.24167	5.0211		1677	2592			1.02762	1.51668		1.02865	0.528402
	1315153	926657		73.5	77.91			2.44067	5.81742		3066	2688			2.00659	0.556306		0.831869	0.277719
	1398200	734465		82.53	72.71			22.6038	10.2956		1351	1907			1.02287	1.64347		3.27737	0.386039
	1647444	1743149		78.11	85.22			7.3973	12.9144		1768	1347			1.5072	1.09577		0.479177	0.406446
	1545547	1625978		81.63	81.85			3.29736	5.99456		3054	1875			2.26734	1.18268		0.69259	0.698671
	912675	1351762		65.45	81.92			7.88513	7.07717		1476	1554			1.5221	1.49413		0.509892	0.693347
	1471423	1710478		82.33	83.59			5.65901	6.6291		1715	2312			0.776712	1.87308		1.11041	0.449917
	1580353	736029		76.91	84.89			5.70867	8.57668		2021	1993			2.46701	1.3255		0.972846	0.729917
	618310	1474981		73.88	82.85			16.3935	4.49157		2360	1750			1.84292	0.624168		4.63377	0.562805
	1561943	1326070		84.81	74.3			5.29215	5.23285		1488	1722			0.576369	1.27025		0.559985	0.462547
	844681	1449924		73.31	84.19			11.8388	11.0893		1278	1516			1.06773	1.08848		0.189548	0.997593
	243891	1297795		46.77	83.46			21.47	5.67515		990	3069			1.59781	1.42667		3.61939	0.84985
	546078	762501		60.35	78.53			8.04384	13.9322		1730	976			1.53789	3.34348		0.993715	1.51075
	1129604	1290261		79.09	81.46			8.29408	5.37584		1855	2256			1.67223	1.50581		0.971146	0.442744
	2037367	1914741		85.12	84.52			18.1877	9.1052		1449	1734			2.1694	1.0191		4.11839	0.552465
	1656862	501377		82.18	83.08			3.0863	6.12146		2503	1749			1.51748	1.46642		0.576198	0.946942
	552146	1707340		65.68	84.08			24.8757	7.17958		1187	811			0.524589	1.17466		3.65308	0.0198255
	836228	1218808		60	83.3			11.6055	15.1933		1603	1185			1.92299	1.18915		1.04356	0.616158
	38902	1224268		78.93	83.32			5.51095	7.66646		2283	1725			1.19132	2.21179		0.652945	0.413895
	1896685	2427603		82.06	87.02			9.72867	4.82525		1394	1629			2.09934	0.897332		0.829719	1.28466
	1068513	670923		67.76	55.46			5.65978	7.06345		1951	1962			2.69985	1.36335		0.463615	0.0743118
	727629	1942914		57.76	84.03			5.98899	3.85342		1701	1998			2.40241	1.38812		1.8067	0.992654
	1298375	878772		85.47	80.64			18.8916	13.7792		985	1966			1.89604	1.38804		0.658233	0.684944
	1055120	1214835		74.53	82.39			6.57125	16.1924		1806	1449			1.33348	2.83009		0.478347	1.01339
	392649	2042613		53.29	85.51			5.67961	5.55117		2440	3130			1.47825	1.07646		0.554274	0.440772
	614322	1623481		74.44	81.44			7.02791	9.60004		2302	1080			1.52608	1.87683		0.669181	0.415421
	1641059	1256004		80.79	81.34			27.4351	11.4834		1343	1428			0.721824	2.00231		1.4942	0.768456
	931283	1207509		63.89	85.54			2.11246	7.53974		3425	1779			1.41369	1.56658		0.919907	1.27975
	879418	1488795		62.06	82.28			12.2041	11.0044		1355	1218			2.90158	2.27552		2.10642	2.81278
	2133829	544093		81.93	57.75			4.85868	8.40027		2097	1507			0.936455	0.617585		0.204652	0.235179
	1321766	801639		78.05	73.88			4.12573	4.63469		2459	2261			0.839642	1.46493		0.263416	0.452851
	734264	1319710		71.72	83.97			9.09885	6.37414		1238	1569			0.671395	0.79546		1.40268	1.16624
	976879	1548607		79.42	83.99			6.6596	13.9307		2678	2306			1.0945	1.94335		1.08547	0.564459
	1691140	433384		83.19	65.86			17.9672	7.03451		1743	1945			2.11121	2.08514		4.80677	0.550127
	1048002	1605778		73.55	84.62			10.7542	8.47617		1325	1508			0.995037	1.62439		0.767968	0.518052
	502824	988790		81.49	84.88			8.49404	12.1177		1797	1419			1.80171	1.41859		0.431221	0.384334
	879476	1042411		81.22	80.12			17.6608	7.72816		1036	1270			0.448518	0.942395		0.540443	1.20984
	1615500	33424		79.8	84.53			7.46442	21.8394		2134	1064			1.5007	1.00079		1.06045	1.10534
	502524	1963556		59.29	84.96			8.27676	6.74164		1650	2206			1.46988	0.711527		1.05608	0.515759
	1393813	1009334		83.67	82.35			8.71334	7.08382		1151	1570			0.937206	1.0233		1.57021	0.609847
	757565	1889776		79.61	85.93			9.96674	6.81825		1956	1756			0.850759	1.81449		0.723968	0.453528
	809439	227706		72.68	53.9			5.13623	11.5772		1898	1402			0.371557	2.89056		0.557092	0.330649
	696782	1591504		68.58	83.99			11.3577	6.90063		1776	1571			1.83063	2.58418		1.56827	1.33511
	51906	1617515		72.89	81.93			20.9635	6.29657		1197	1217			1.85132	1.29505		5.05776	1.51253
	1478106	189500		82.11	39.84			20.7042	6.83556		1524	2328			2.37898	1.33192		4.97634	0.25575
	822244	1367205		67.44	83.38			7.24595	10.8038		2028	1776			1.36608	1.93933		1.51838	0.590497
	15042	207352		82.08	57.43			2.91692	8.3581		2540	1536			1.68058	2.16547		0.876009	1.09365
	544472	1841056		73.56	85.64			6.233	24.8057		2998	765			0.760009	0.420468		0.493924	0.399316
	1208495	1182350		68.95	84.24			14.1481	12.7059		1788	1738			1.24289	0.864414		1.76008	2.16024
	1345564	1819413		78.26	84.97			9.55504	0.653885		1255	605			1.15527	0.718117		0.778643	0.0598652
	1851065	1843134		81.33	84.94			1.9244	7.80436		3472	1874			1.38053	1.76398		0.644861	0.73404
	1043462	1962155		72	84.63			17.4055	6.23811		1006	1916			1.93042	0.979051		0.39084	0.661772
	1062241	211397		76.29	41.38			10.245	6.25812		1365	2010			1.97039	1.0926		2.37401	0.582443
	382362	408651		53.78	54.36			4.22495	6.61982		2467	2765			2.2404	1.21777		0.923053	0.532626
	620291	747237		82.34	70.77			23.0357	3.93003		994	2087			3.25969	1.04034		5.26846	0.350089
	1007896	1044817		82.57	77.08			4.89917	6.30313		2153	2491			1.24131	1.88748		0.359984	0.526548
	218273	1089351		47.99	79.65			3.66598	4.60269		1992	2145			1.68129	1.36258		0.810617	1.18385
	1507828	1443539		80.46	83.1			4.16524	6.05797		2264	1830			2.78008	0.813427		0.894823	0.312358
	1299040	413951		74.61	79.13			7.81217	4.38467		2361	2792			0.979475	1.44936		0.507329	0.440054
	972163	1581430		76.58	85.03			5.36026	13.603		2044	1344			2.43062	0.911329		0.698809	1.23346
	873969	579905		79.36	58.13			2.04022	5.18089		3872	2668			1.97911	0.813525		0.624272	0.531952
	1100867	977163		77.81	83.43			10.7602	10.4659		1749	1329			1.95922	1.69477		1.97395	0.869403
	1542471	947137		86.9	84.08			6.22371	22.3352		2057	891			1.72618	3.30376		1.63385	0.58925
	1008025	1561914		65.05	83.67			21.9433	7.1899		796	1655			1.37208	1.26651		1.44802	0.600503
	219156	879854		38.95	84.57			6.11499	10.853		2294	1669			2.29844	2.01281		1.17905	0.191782
	847786	840550		70.12	80.86			4.08505	11.5441		2570	1462			2.52982	1.25143		0.631547	0.60696
	1824169	1300883		80.59	81.66			12.3304	15.4355		1363	1177			0.30071	2.50894		0.771684	0.5139
	1244571	1329410		81.7	80.39			24.1185	7.36429		1136	1857			1.33336	1.10794		2.75035	0.895275
	939391	927828		77.94	76.24			7.94072	8.59542		1879	1801			1.88255	1.25439		1.00991	0.403288
	296468	64464		45.94	71.81			11.5523	12.0237		1169	1511			0.869011	1.0086		0.77098	0.316232
	1233581	2243647		85.64	84.73			15.4459	10.3577		1594	1569			1.98436	1.68624		4.13365	4.48792
	313098	1196006		71.27	84.86			9.83653	16.2414		1179	928			1.53347	1.22178		0.7624	0.786821
	1599094	1525651		79.76	81.06			18.0252	7.46321		1356	2271			0.767469	1.34115		0.666228	0.697312
	1690345	2586290		83.17	86.96			15.8078	5.76972		966	2250			0.910024	0.793037		1.1284	0.302055
	1218176	942660		71.47	83.01			8.55231	7.93341		1898	1447			2.11252	1.42395		2.63398	0.755845
	934489	1374033		74.14	85.95			9.68548	9.18575		941	1786			1.37223	1.76948		0.471473	0.476909
	91271	2159230		71.11	85.33			6.93896	4.50432		1985	2214			1.13627	1.22841		0.570086	0.376468
	1514935	1618126		82.78	84.8			9.26712	6.44139		1456	1896			2.07504	1.08613		2.02761	0.251593
	1628231	1213565		81.3	83.09			10.9328	4.54963		1290	2592			1.02413	0.958823		1.10583	0.670005
	1677659	2254591		82.66	85.29			6.41668	6.81935		1837	3173			1.1232	2.1026		0.897508	0.770079
	2856895	1896237		84.59	83.86			3.85878	7.77387		2422	1551			1.6549	1.85662		0.671067	0.788258
	858400	1332839		79.91	84.11			6.79467	5.30308		1896	2650			0.609913	1.00574		0.614147	0.824434
	1959225	349530		84.11	49.9			21.8004	5.5772		941	1879			1.6744	2.16099		0.790296	0.288348
	739137	897813		57.66	65.64			12.185	4.97085		1875	1771			1.63023	0.676684		1.67887	0.846521
	747085	199571		73.15	79.02			4.77925	6.41026		2274	2330			0.605451	2.69296		0.763138	0.59152
	808254	1323418		61.55	86.83			9.57462	8.54469		1457	1852			0.941326	1.10237		0.441536	0.583103
	2175863	1478732		84.04	81.8			11.778	6.32372		1400	2061			0.79285	0.623127		0.827154	0.915955
	1785646	2456091		82.67	85.19			8.52093	7.42682		1525	2379			1.67165	0.793461		1.22947	0.885503
	1790677	952600		83.33	86.5			16.2324	12.6422		1449	1641			1.96764	1.54775		5.34219	0.709802
	1665127	1225556		80.76	82.56			4.70107	9.48106		1620	1349			0.893231	0.566851		0.915272	0.571728
	2015081	1847033		84.74	80.62			7.62132	13.8863		1400	1148			1.66679	1.83666		1.07307	0.993909
	2061737	1085574		84.21	71.96			2.16451	2.53944		3353	3235			1.85373	0.514371		0.938911	0.27726
	1511862	421045		80.26	82.21			9.71566	10.9553		1208	1478			0.58327	1.81994		0.57184	0.345727
	1503928	208723		75	58.08			5.16999	26.2925		2576	721			0.814254	0.910087		0.406414	0.744475
	588878	1366907		62.43	80			16.6523	8.32513		1340	1710			2.25385	0.836319		3.32492	0.439457
	277836	1969328		42.42	84.41			8.18427	8.60152		2171	1845			1.0955	0.99084		0.847788	0.402462
	1093666	1462245		76.08	83.34			4.6094	7.83627		2723	2062			0.651317	1.16253		0.65687	0.337699
	727120	922364		76.2	76.29			17.5237	9.71967		2121	1741			1.96681	2.40789		2.39815	0.4591
	525524	1211118		63.9	84.37			5.49228	28.9713		2405	811			1.36867	1.20423		1.13707	4.5219
	1112387	1482204		81.63	80.81			7.02897	6.19361		1683	2029			1.55517	0.933182		0.4667	0.311498
	1095963	817341		79.75	81.3			9.86896	6.0191		1964	2358			1.29404	1.94401		0.904216	0.715301
	1416581	687723		75.5	74.15			7.15969	6.03882		2657	1771			2.35945	1.26892		0.888034	0.71737
	1038660	1610465		71.24	84.37			6.57207	5.04341		2227	2357			1.06165	1.23647		0.707518	0.60274
	455530	1734287		60.69	84.28			3.29305	7.17785		2481	1995			0.458936	1.54297		0.276382	0.391335
	395026	1617805		70.53	81.95			7.01381	13.5958		1755	1147			0.816391	1.46772		0.961424	0.711565
	21795	1519811		66.18	83.52			2.84488	9.2309		2856	1411			2.28122	1.01704		0.444543	0.488914
	454955	1916251		81.27	85.14			8.85526	7.34115		2684	1540			1.04664	0.765843		0.669345	0.569087
	905672	1407847		68.33	81.97			9.98562	7.37432		1740	1290			1.18738	1.81582		4.43728	0.781135
	939214	1677603		77.58	82.64			14.5835	4.86724		1040	2471			0.750635	0.670754		1.91934	0.479666
	918373	1116556		77.86	82.52			9.67529	9.30974		1283	2068			0.756133	1.89859		0.607037	0.459927
	1684455	2556625		84.41	85.4			16.6688	6.18696		1285	2217			1.98897	1.34076		1.13762	0.378368
	742354	1471753		71.28	82.76			7.89192	6.4456		1299	1539			1.13146	0.775707		0.600462	0.290567
	1461903	263017		83.47	48.72			6.66285	7.40279		2342	1432			2.6057	1.2769		1.48955	0.435417
	305152	61265		49.65	78.5			6.54176	10.1443		1467	1453			0.86995	2.05687		0.85889	1.12515
	956377	1459469		77.18	83.87			3.91761	7.11761		2474	2067			2.00052	1.45471		0.821138	1.16654
	593232	1083489		65.65	80.79			7.1544	6.37131		1423	1036			0.5135	1.16816		1.19063	1.11949
	977694	1525281		74.93	83.71			15.9263	5.9616		1403	2291			2.39915	1.66559		1.52921	0.410971
	2248688	1789340		83.02	83.82			5.95239	7.54696		1716	1417			2.18867	1.59929		0.852104	0.688517
	1632750	1380729		81.24	81.17			5.17578	26.3039		1721	1153			0.803969	1.13718		0.614892	5.08915
	1373756	1184525		85.35	76.54			24.5005	6.1484		1180	2444			1.39026	0.785739		5.21094	0.530594
	6207	501359		81.86	81.64			4.14622	6.56393		3141	2035			0.947523	3.12833		0.814448	0.826126
	998835	2051443		72.86	86.09			26.5801	5.43029		1603	2110			1.92731	1.10486		5.24163	0.390731
	1979236	401033		82.61	81.62			15.9764	4.07728		482	2788			0.76225	0.658914		0.305646	0.528471
	944755	1236678		75.4	83.7			9.0769	5.18857		1607	2306			1.36215	1.22716		1.66049	0.368223
	1472805	1333973		85.01	83.57			0.042196	4.63978		363	3404			0.222292	0.828576		8.14526	0.447079
	969255	496672		79.74	69.9			8.43875	9.13077		1457	2369			1.9415	1.42064		1.14411	0.891746
	1350896	1267506		81.08	82.02			10.1005	18.5566		1495	957			0.967592	3.21997		1.08138	0.522903
	1340852	41727		79.08	74.5			8.07852	8.42746		1361	1258			0.762886	1.34977		1.00985	0.52846
	652929	1496106		74.63	85.65			7.76641	6.05503		1914	1680			2.04462	1.45583		0.913706	0.399939
	1250712	1093487		84.08	80.77			15.907	13.5605		1677	996			1.11998	1.38522		4.07767	0.612917
	1198859	444134		77.05	83.94			6.18842	15.6129		2261	1304			2.28556	2.18067		0.809395	1.1315
	1416066	1057040		82.71	83.04			4.0382	4.13683		2683	2557			1.98171	1.44022		0.796852	0.218055
	1200931	991514		79.95	84.55			24.7859	6.79786		893	2450			1.01484	1.26647		5.83922	0.598692
	1294631	2100681		79.61	83.44			3.19764	9.66964		2653	1619			1.92042	1.28723		0.788863	0.54865
	996153	1342843		83.73	73.85			4.07436	11.7962		2669	1430			2.46231	2.69997		0.726874	0.926666
	997519	1919674		75.68	83.28			6.85052	13.3142		1999	1515			0.824765	2.11993		0.660349	0.957747
	674714	1730217		68.73	81.04				3.27259			2565				0.750966			0.538349
	876819	1877302		79.56	86.07				12.8085			1523				1.40931			0.90634
	555793	2314480		75.71	87.49				5.95542			2398				1.97498			0.45348
	1384217	1789535		83.14	86.76				3.68302			1966				0.487055			0.317992
	1576632	846005		79.81	83.08				4.65312			2654				0.624613			0.869908
	639104	285357		80.03	51.88				7.68495			1666				2.22077			1.03703
	990040	725461		65.34	73.38				6.33473			2207				1.31825			1.39334
	1242031	1549912		82.37	84.78				6.51494			2628				0.94349			0.715917
	613467	907698		76.03	83.79				12.8504			1677				3.14525			1.78041
	1870083	297213		82.94	72.94				7.36895			2388				0.801922			1.30459
	144906	617248		82.01	65.5				4.28122			2438				1.34015			0.181584
	52214	1271399		81.42	83.85				6.62665			1722				3.85502			0.311348
	821670	1686483		71.27	82.41				6.63541			1641				1.07679			0.920478
	566728	176071		76.08	53.07				4.52586			2457				1.43425			0.230581
	1124823	836764		82.05	83.28				3.71967			2806				1.58083			0.321796
	1102011	1532144		73.53	84.8				7.0831			1792				1.70563			1.51501
	1537102	1569934		80.1	84.04				10.9715			1796				2.19295			0.581585
	1357680	1154378		81.97	81.03				5.39467			1782				0.399257			0.484593
	1748217	1347912		83.36	81.14				5.28785			2159				1.01321			0.23301
	425805	1433832		50.71	82.35				3.47746			2475				1.46532			0.524834
	755130	394309		73.17	68.4				4.99333			1066				0.562411			0.67818
	1251427	1616636		79.12	85.6				4.80418			1571				0.819324			0.923558
	1628368	927484		84.68	77.07				5.66555			3287				1.38239			0.492416
	2116526	1184423		84.56	86.93				7.07974			1925				2.43719			1.49946
	1239863	1015557		77.23	70.63				7.63859			1575				1.45766			0.521422
	1818918	1246457		82.24	76.45				12.232			1177				1.81772			0.709542
	809284	1769068		65.62	83.74
		2110973			84.59
		1614443			83.19
		319990			80.93
		1579306			83.48
		1712180			83.39
		1643482			81.56
