# Supplementary material for: Distinct skeletal stem cell types orchestrate long bone skeletogenesis
Source: eLife. 2021 Jul 19;10:e66063. doi: 10.7554/eLife.66063 (PMC8289409; doi:10.7554/eLife.66063)
Supplement: Figure 3—source data 1. [file elife-66063-fig3-data1.xlsx]

## Sheet: Sheet1
Figure 3E						Figure 3F									Figure 3G
	ocSSC no	ocSSC irra	pvSSC no	pvSSC irra				ocSSC			pvSSC
	0.023	0.01	0.022	0.1			5dpf	4.56853	3.84226	3.13316	1.61101	3.16302	2.25035				2 mo			30 mo
	0.018	0.00416	0.028	0.11			10 dpf	3.90909	4.2007	3.70899	0.345185	1.41176	2.04762			ocSSC	0.925926	0.907407	1.16667	0.666667	0.481481	0.777778
	0.02	0.013	0.031	0.066			15 dpf	2.63636	3.5	2	1.19178	2.15385	1.26866			BCSP	0.881517	1.39336	0.725118	0.21327	0.369668	0.156398
	0.027	0.011	0.013	0.13												pvSSC	0.888268	1.15642	0.955307	4.18994	2.51397	2.51397
	0.02	0.024	0.015	0.097												APC	1.27217	0.340015	1.38782	8.32691	9.83038	9.83038
	0.017	0.00928	0.028	0.16
		0.00979		0.086
