# Supplementary material for: Distinct skeletal stem cell types orchestrate long bone skeletogenesis
Source: eLife. 2021 Jul 19;10:e66063. doi: 10.7554/eLife.66063 (PMC8289409; doi:10.7554/eLife.66063)
Supplement: Figure 4—source data 1. [file elife-66063-fig4-data1.xlsx]

## Sheet: Sheet1
Figure4C																								Figure4D																					Figure4F
		ocSSC			pvSSC			non-hematopoietic			APC			Tie2			6C3+			THY1+						LepR-									LepR+											gpSSC-	gpSSC+	pvSSC-	pvSSC+
	E17.5	21.1	10.7	12.1	48.3	48.5	42.2	23.3	12.5	11.5	58.3	40	25	76.7	60.5	57	37.7	17.5	20.8	30.5	21	23			ocSSC/BCSP	13.3333	10	8.88889	11	8	11	10.7	12	9.3	10	7.77778	10	6	4	4	11.3	10	11.3			96.1539	95.3488	84.0909	96.875
	E19	8.31	10.9	8.71	57.7	74.1	59.8	9.95	13.1	10.9	50	73.7	62.5	55.5	69.5	56	11	20	10.2	13	21	16.3			pvSSC	2.2	1.1	2.2	5.3	6.7	4.7				6.7	8.9	6.7	5.3	5.3	2.7						97.9167	97.7778	92.6829	100
	P1	10.4	11.2	8.11	54	60.5	47.6	14.3	15.7	12.5	49.4	48.6	46.3	58.8	61.7	62.5	24.9	29.6	24.1	24.7	28.7	22.7																								87.5	90.9091	97.2222	97.1429
	1wk	18.5	10.2	19.3	29.4	50	46.5	17.3	10.9	21.1	11.8	11.8	16.7	53.7	52	64.9	24	16	31.1	29.2	27.6	29.1																								95.1219	95.9184	93.8775	93.3333
	8wks	13.1	8.33	9.26	34.6	31.3	43.5	4.2	3.72	3.57	14.5	14	16.7	69.9	76	72	13.1	11.6	12.9	39.8	32.3	32.7																								97.7778	90	89.7436	96.4286
