# Supplementary material for: Distinct skeletal stem cell types orchestrate long bone skeletogenesis
Source: eLife. 2021 Jul 19;10:e66063. doi: 10.7554/eLife.66063 (PMC8289409; doi:10.7554/eLife.66063)
Supplement: Figure 5—figure supplement 1—source data 1. [file elife-66063-fig5-figsupp1-data1.xlsx]

## Sheet: Sheet1
Figure5 - Supplement1D
	1	2	3	4
	0.991903	0.403509	0.182186	0.503374
	0.97031	0.511471	0.441296	0.587045
	0.905533	0.165992	0.495277	0.163293
	0.819163	0.238866	0.45749	0.098516
	0.875843	0.57085	0.446694	0.336032
	0.697706	0.681511	0.479082	0.31444
	0.848853	0.500675	0.360324	0.290148
	0.805668	0.398111	0.365722	0.560054
	0.641026	0.462888	0.300945	0.357625
	0.727395	0.546559	0.260459	0.797571
	0.85695	0.160594	0.460189	0.093117
	0.775978	0.422402	0.565452	0.060729
	0.608637	0.562753	0.392713	0.292848
	0.62753	0.349528	0.443995	0.811066
	0.892038	0.705803	0.203779	0.34143
	0.956815	0.246964	0.538462	0.217274
	0.792173	0.487179	0.311741	0.209177
	0.638327	0.614035	0.425101	0.109312
	0.967611	0.319838	0.263158	0.497976
	0.786775	0.346829	0.414305	0.179487
	0.60054	0.354926	0.373819	0.192982
	0.838057	0.303644	0.37112	0.152497
	0.924426	0.225371	0.40081	0.095816
	0.765182	0.568151	0.252362	0.578947
	0.516869	0.808367	0.411606	0.673414
	0.468286	0.473684	0.17139	0.646424
	0.616734	0.703104	0.244265	0.738192
	0.751687	0.195682	0.309042	0.919028
	0.854251	0.317139	0.22807	0.249663
	0.735493	0.387314	0.506073	0.605938
	0.878543	0.417004	0.519568
	0.695007	0.219973	0.554656
	0.908232	0.470985	0.435897
	0.916329	0.295547	0.198381
	0.581646	0.352227	0.176788
	0.897436	0.322537	0.273954
	0.767881	0.48448	0.384615
	0.659919	0.28475	0.306343
	0.611336	0.168691	0.363023
	0.759784	0.481781	0.330634
	0.589744	0.11471	0.452092
	0.935223	0.476383	0.535762
	0.962213	0.271255	0.379217
	0.757085	0.282051	0.533063
	0.676113	0.449393	0.390013
	0.711201	0.128205	0.406208
	0.662618	0.265857	0.368421
	0.719298	0.255061	0.381916
	0.921727	0.549258	0.4278
	0.557355	0.395412	0.211876
	0.94332	0.144399	0.279352
	0.867746	0.376518	0.508772
	1	0.65722	0.333333
	0.754386	0.136302	0.430499
	0.821862	0.870445	0.287449
	0.937922	0.716599	0.206478
	0.843455	0.522267	0.34413
	0.813765		0.419703
	0.994602		0.489879
	0.624831		0.454791
	0.840756		0.438596
	0.654521		0.236167
	0.816464		0.492578
	0.932524		0.184885
	0.873144		0.241565
	0.88664		0.041835
	0.902834		0.222672
	0.929825		0.433198
	0.862348		0.25776
	0.82996		0.327935
	0.748988
	0.832659
	0.910931
	0.619433
	0.959514
	0.7139
	0.846154
	0.603239
	0.986505
	0.927126
	0.724696
	0.74359
	0.651822
	0.77058
	0.951417
	0.978408
	0.781377
	0.721997
	0.859649
	0.851552
	0.584345
	0.91363
	0.551957
	0.789474
	0.632928
	0.643725
	0.576248
	0.80027
	0.592443
	0.732794
	0.889339
	0.894737
	0.778677
	0.802969
	0.794872
	0.541161
	0.622132
	0.692308
	0.573549
	0.649123
	0.597841
	0.865047
	0.670715
	0.708502
	0.762483
	0.900135
	0.954116
	0.835358
	0.684211
	0.54386
	0.68691
	0.595142
	0.824561
	0.940621
	0.784076
	0.665317
	0.746289
	0.524966
	0.975709
	0.773279
	0.678812
	0.82726
	0.527665
	0.700405
	0.325236
	0.964912
	0.989204
	0.946019
	0.530364
	0.973009
	0.630229
	0.740891
	0.997301
	0.883941
	0.730094
	0.668016
	0.689609
	0.881242
	0.948718
	0.983806
	0.981107
	0.465587
	0.338731
	0.635628
